# Supplementary material
Source: publisher figshare collection journal article supplement (https://acs.figshare.com/ndownloader/files/4495279)
Supplement: Supplementary file 1 [file 4495279]

## Supporting Information

# **Catalyst-free Synthesis, Structural and Mechanical Characterization of Single Crystalline $\text{Ca}_2\text{B}_2\text{O}_5\cdot\text{H}_2\text{O}$ Nanobelts and Stacking Faulted $\text{Ca}_2\text{B}_2\text{O}_5$ Nanogrooves**

Lihong Bao, Zhi-Hui Xu, Rui Li, Xiaodong Li\*

*Department of Mechanical Engineering, University of South Carolina, 300 Main  
Street, Columbia, SC 29208, USA*

## **Experimental**

The chemical compositions and oxidation states of the  $\text{Ca}_2\text{B}_2\text{O}_5\cdot\text{H}_2\text{O}$  (CBOH) nanobelts and  $\text{Ca}_2\text{B}_2\text{O}_5$  (CBO) nanogrooves were further characterized by X-ray photoelectron spectroscopy (XPS) (a Kratos Axis Ultra DLD instrument equipped with a monochromated Al  $K_\alpha$  X-ray source and a hemispherical analyzer with an energy resolution of 0.5 eV) and Fourier transform infrared (FTIR) spectroscopy (a Perkin Elmer Spectrum 100 FTIR spectrometer with a Diamond ATR attachment).

## **Supplemental Figures**

### **Supplemental Figure 1**

XPS spectra of the CBOH nanobelts and CBO nanogrooves, labeled as  $\alpha$  and  $\beta$ , respectively. Calibration was carried out by taking the binding energy of the C 1s core level at 284.8 eV. Both survey spectra, shown in Figure 1a, exhibit Ca 2p (346.2 eV), Ca 2s (437.6 eV), B 1s (188.2 eV), O 1s (532 eV) and C 1s (284.8 eV) core levels, and no other impurity levels were detected, further indicating the high purity of the

---

\* Author to whom correspondence should be addressed. E-mail: lixiao@cec.sc.edu

products. In Figure 1b, the peaks at 346.2 eV and 349.8 eV can be assigned to Ca 2p<sub>3/2</sub> and Ca 2p<sub>1/2</sub>, respectively. Figure 1c shows the B 1s XPS spectra, the peak at 188.3 eV can be attributed to B 1s<sub>1/2</sub> core level. As shown in Figure 1d, there are two peaks (530.0 eV and 531.7 eV) for O 1s state in the CBOH nanobelts. This is probably due to two different oxidation states of O 1s at the molecule CBOH, one of which is for the CBO molecule, and another is for the hydrated H<sub>2</sub>O molecule.

### Supplemental Figure 2

FTIR spectra of the CBOH nanobelts and CBO nanogrooves. For the CBOH nanobelts (Figure 2a), the adsorption band at 3353 cm<sup>-1</sup> can be assigned to the stretching mode of O-H.<sup>1-2</sup> There is no adsorption band detected at 1600-1700 cm<sup>-1</sup>, which arises from the bending mode of H-O-H, and this result indicates that the compound doesn't contain crystal water.<sup>3</sup> The adsorption bands at 1414, 1321 and 911 cm<sup>-1</sup> result from the asymmetric and symmetric stretching modes of B<sub>(3)</sub>-O, respectively. The band at 1155 cm<sup>-1</sup> is related to the in-plane bending mode of B-O-H. The weak band at 875 cm<sup>-1</sup> comes from the symmetric stretching mode of B<sub>(4)</sub>-O.<sup>3</sup> The very strong band at 708 cm<sup>-1</sup> originates from the out-of-plane bending mode of B<sub>(3)</sub>-O.<sup>1,3</sup> As for the CBO nanogrooves (Figure 2b), there is no adsorption detected at 3000-3600 cm<sup>-1</sup>, which suggests that the H<sub>2</sub>O in CBOH has been completely removed after annealing. All other adsorption bands close to that of CBOH nanobelts have the same origins according to the previous literature.<sup>1</sup>

### References

- (1) Kessler, G. Z. *Allg. Chem.* **1966**, 343, 25-38.

(2) Liu, Z. H.; Zuo, C. F.; Li, S. Y. *Thermochim. Acta* **2004**, 424, 59-62.

(3) Li, J.; Xia, S. P.; Gao, S. Y. *Spectrochim. Acta* **1995**, 51A, 519-532.

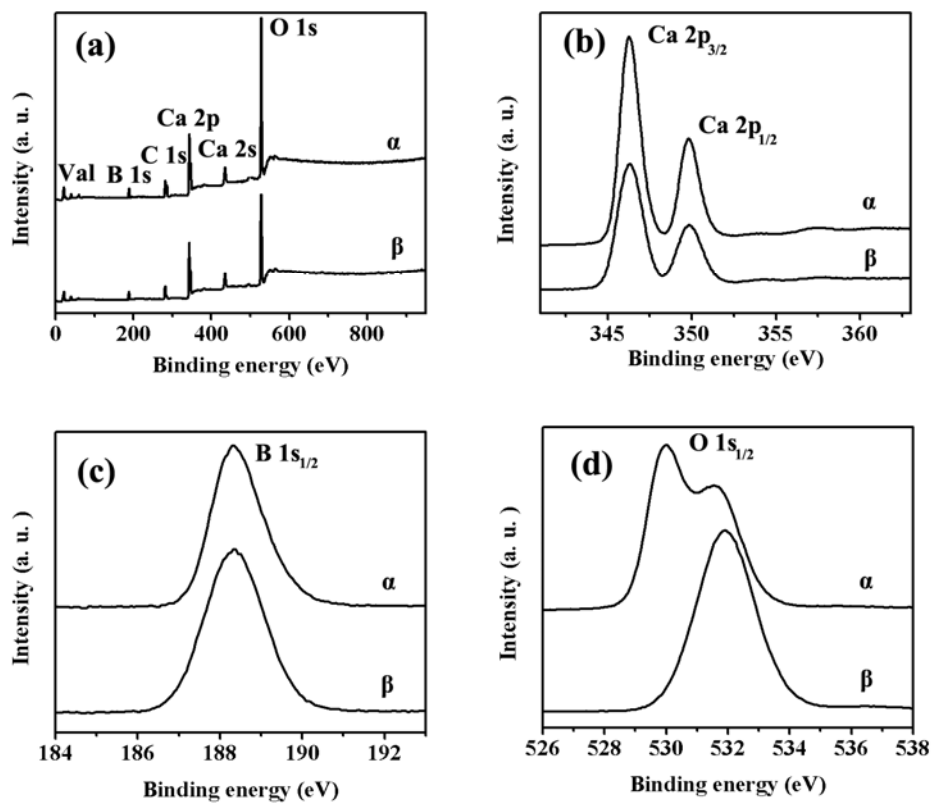

**Figure 1**

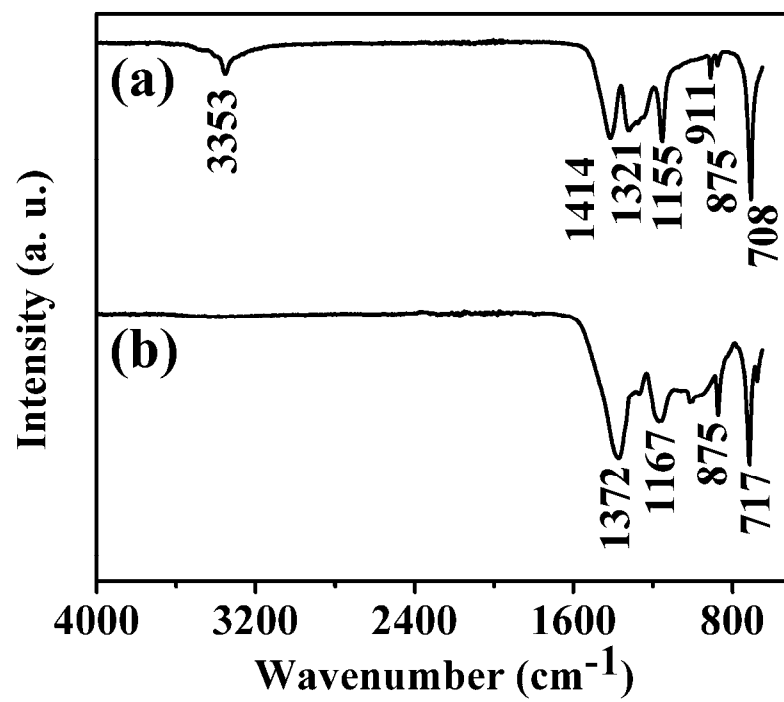

Figure 2
